# Supplementary material
Source: ML conference proceedings conference paper supplement (https://openaccess.thecvf.com/content/ICCV2023/html/Gao_DQS3D_Densely-matched_Quantization-aware_ICCV_2023_paper.html)
Supplement: Supplementary file 1 [file Gao_DQS3D_Densely-matched_Quantization-aware_ICCV_2023_supplemental.pdf]

# Supplementary Material for DQS3D: Densely-matched Quantization-aware Semi-supervised 3D Detection

Huan-ang Gao<sup>1,2</sup> Beiwen Tian<sup>1,2</sup> Pengfei Li<sup>1,2</sup> Hao Zhao<sup>1</sup> Guyue Zhou<sup>1</sup>

<sup>1</sup>Institute for AI Industry Research (AIR), THU

<sup>2</sup>Department of Computer Science and Technology, THU

{gha20, tbw18, li-pf22}@mails.tsinghua.edu.cn {zhaohao, zhouguyue}@air.tsinghua.edu.cn

## A. Proof of Equations

**Lemma 1** If all elements in  $\mathbf{A}$  are integers, then the following equation holds:

$$[\mathbf{A} + \mathbf{B}] = \mathbf{A} + [\mathbf{B}] \quad (1)$$

**Proof:** By definition.  $\square$

**Lemma 2** If all elements in  $\mathbf{A}$  are integers and  $\theta \in \{\frac{k\pi}{2}\}_{k=0}^3$ , then all elements in  $\mathbf{AR}_\theta$  are integers.

**Proof:** By considering the rotation matrix  $\mathbf{R}_{\frac{k\pi}{2}}$  when  $k = 0, 1, 2, 3$ . Note that  $x' = x \cos \theta + y \sin \theta$ ,  $y' = -x \sin \theta + y \cos \theta$  and  $z' = z$ . When  $k = 0, 1, 2, 3$ ,  $\sin \theta$  and  $\cos \theta$  produces integer values. According to the property of integer fields,  $x', y'$  and  $z'$  are also integers, which means all elements in  $\mathbf{AR}_\theta$  are integers.  $\square$

**Proof of Equation 2** Here we prove:

$$\begin{aligned} \bar{\delta}_1^{\mathbf{A}'} &= \frac{\cos \theta + 1}{2} \delta_1^{\mathbf{A}} + \frac{-\cos \theta + 1}{2} \delta_2^{\mathbf{A}} + \frac{-\sin \theta}{2} \delta_3^{\mathbf{A}} + \frac{\sin \theta}{2} \delta_4^{\mathbf{A}}, \\ \bar{\delta}_2^{\mathbf{A}'} &= \frac{-\cos \theta + 1}{2} \delta_1^{\mathbf{A}} + \frac{\cos \theta + 1}{2} \delta_2^{\mathbf{A}} + \frac{\sin \theta}{2} \delta_3^{\mathbf{A}} + \frac{-\sin \theta}{2} \delta_4^{\mathbf{A}}, \\ \bar{\delta}_3^{\mathbf{A}'} &= \frac{\sin \theta}{2} \delta_1^{\mathbf{A}} + \frac{-\sin \theta}{2} \delta_2^{\mathbf{A}} + \frac{\cos \theta + 1}{2} \delta_3^{\mathbf{A}} + \frac{-\cos \theta + 1}{2} \delta_4^{\mathbf{A}}, \\ \bar{\delta}_4^{\mathbf{A}'} &= \frac{-\sin \theta}{2} \delta_1^{\mathbf{A}} + \frac{\sin \theta}{2} \delta_2^{\mathbf{A}} + \frac{-\cos \theta + 1}{2} \delta_3^{\mathbf{A}} + \frac{\cos \theta + 1}{2} \delta_4^{\mathbf{A}}, \\ \bar{\delta}_5^{\mathbf{A}'} &= \delta_5^{\mathbf{A}}, \bar{\delta}_6^{\mathbf{A}'} = \delta_6^{\mathbf{A}}, \bar{\delta}_7^{\mathbf{A}'} = \delta_7^{\mathbf{A}} \cos(2\theta), \bar{\delta}_8^{\mathbf{A}'} = \delta_8^{\mathbf{A}} \cos(2\theta). \end{aligned} \quad (2)$$

**Proof:** Assume the bounding box  $\mathbf{y}$  is centered at  $\mathbf{c} \in \mathbb{R}^{3 \times 1}$  with dimension  $\mathbf{d} \in \mathbb{R}^{3 \times 1}$  and yaw  $\phi \in \mathbb{R}$ . Since the spatial translation does not affect the relative position of voxels and bounding boxes, here we can only consider the effect of random rotation around the upright-axis  $\theta$ . Since we have:

$$\begin{bmatrix} \bar{\delta}_1^{\mathbf{A}'} \\ \bar{\delta}_2^{\mathbf{A}'} \\ \bar{\delta}_3^{\mathbf{A}'} \\ \bar{\delta}_4^{\mathbf{A}'} \end{bmatrix} = \begin{bmatrix} \tilde{x} - \tilde{\hat{x}} \\ \tilde{y} - \tilde{\hat{y}} \\ \tilde{y} - \tilde{\hat{y}} \\ \tilde{y} - \tilde{\hat{y}} \end{bmatrix} + \begin{bmatrix} \frac{1}{2}w \\ \frac{1}{2}h \\ \frac{1}{2}h \\ \frac{1}{2}h \end{bmatrix} = \begin{bmatrix} x - \hat{x} \\ \hat{x} - x \\ y - \hat{y} \\ \hat{y} - y \end{bmatrix} + \begin{bmatrix} \frac{1}{2}w \\ \frac{1}{2}h \\ \frac{1}{2}h \\ \frac{1}{2}h \end{bmatrix} \quad (3)$$

By noting that,

$$\begin{aligned} \begin{bmatrix} x - \hat{x} \\ y - \hat{y} \end{bmatrix} &= \begin{bmatrix} \cos \theta & -\sin \theta \\ \sin \theta & \cos \theta \end{bmatrix} \begin{bmatrix} x - \hat{x} \\ y - \hat{y} \end{bmatrix} \\ &= \frac{1}{2} \begin{bmatrix} \cos \theta & -\sin \theta \\ \sin \theta & \cos \theta \end{bmatrix} \begin{bmatrix} \delta_1 - \delta_2 \\ \delta_3 - \delta_4 \end{bmatrix} \\ &= \frac{1}{2} \begin{bmatrix} \cos \theta & -\cos \theta & -\sin \theta & \sin \theta \\ \sin \theta & -\sin \theta & \cos \theta & -\cos \theta \end{bmatrix} \begin{bmatrix} \delta_1 \\ \delta_2 \\ \delta_3 \\ \delta_4 \end{bmatrix} \end{aligned} \quad (4)$$

And that,

$$\begin{bmatrix} w \\ h \end{bmatrix} = \begin{bmatrix} \delta_1 + \delta_2 \\ \delta_3 + \delta_4 \end{bmatrix} = \begin{bmatrix} 1 & 1 & 0 & 0 \\ 0 & 0 & 1 & 1 \end{bmatrix} \begin{bmatrix} \delta_1 \\ \delta_2 \\ \delta_3 \\ \delta_4 \end{bmatrix} \quad (5)$$

Then we have,

$$\begin{aligned} \bar{\delta}_1^{\mathbf{A}'} &= \frac{\cos \theta + 1}{2} \delta_1^{\mathbf{A}} + \frac{-\cos \theta + 1}{2} \delta_2^{\mathbf{A}} + \frac{-\sin \theta}{2} \delta_3^{\mathbf{A}} + \frac{\sin \theta}{2} \delta_4^{\mathbf{A}}, \\ \bar{\delta}_2^{\mathbf{A}'} &= \frac{-\cos \theta + 1}{2} \delta_1^{\mathbf{A}} + \frac{\cos \theta + 1}{2} \delta_2^{\mathbf{A}} + \frac{\sin \theta}{2} \delta_3^{\mathbf{A}} + \frac{-\sin \theta}{2} \delta_4^{\mathbf{A}}, \\ \bar{\delta}_3^{\mathbf{A}'} &= \frac{\sin \theta}{2} \delta_1^{\mathbf{A}} + \frac{-\sin \theta}{2} \delta_2^{\mathbf{A}} + \frac{\cos \theta + 1}{2} \delta_3^{\mathbf{A}} + \frac{-\cos \theta + 1}{2} \delta_4^{\mathbf{A}}, \\ \bar{\delta}_4^{\mathbf{A}'} &= \frac{-\sin \theta}{2} \delta_1^{\mathbf{A}} + \frac{\sin \theta}{2} \delta_2^{\mathbf{A}} + \frac{-\cos \theta + 1}{2} \delta_3^{\mathbf{A}} + \frac{\cos \theta + 1}{2} \delta_4^{\mathbf{A}}. \end{aligned} \quad (6)$$

The rotation around the upright-axis does not affect  $z$ -coordinates, so it is trivial that,

$$\bar{\delta}_5^{\mathbf{A}'} = \delta_5^{\mathbf{A}}, \bar{\delta}_6^{\mathbf{A}'} = \delta_6^{\mathbf{A}}. \quad (7)$$

The rotation does transform the yaw angle from  $\phi$  to  $\phi - \theta$ , hence we have:

$$\begin{aligned} \bar{\delta}_7^{\mathbf{A}'} &= \log\left(\frac{w}{l}\right) \sin(2\phi - 2\theta) \\ &= \log\left(\frac{w}{l}\right) (\sin(2\phi) \cos(2\theta) - \sin(2\theta) \cos(2\phi)) \\ \bar{\delta}_8^{\mathbf{A}'} &= \log\left(\frac{w}{l}\right) \cos(2\phi - 2\theta) \\ &= \log\left(\frac{w}{l}\right) (\cos(2\phi) \cos(2\theta) + \sin(2\theta) \sin(2\phi)) \end{aligned} \quad (8)$$

By noting that when  $\theta \in \{\frac{k\pi}{2}\}_{k=0}^3$ ,  $\sin(2\theta) \equiv 0$ . That produces,

$$\begin{aligned}\tilde{\delta}_7^{\mathbf{A}'} &= \log\left(\frac{w}{l}\right) \sin(2\phi) \cos(2\theta) = \delta_7^{\mathbf{A}} \cos(2\theta) \\ \tilde{\delta}_8^{\mathbf{A}'} &= \log\left(\frac{w}{l}\right) \cos(2\phi) \cos(2\theta) = \delta_8^{\mathbf{A}} \cos(2\theta)\end{aligned}\quad (9)$$

Eq. 16, Eq. 17 and Eq. 19 can be combined to form Eq. 12.  $\square$

**Proof of Equation 8** Here we prove:

$$[\{\mathbf{A}\}\mathbf{R}_\theta + \{\Delta\mathbf{r}\} + \vec{\mathbf{r}}^T] = \mathbf{0} \quad (10)$$

We start from Eq. 7 from the main paper:

$$[\mathbf{A}\mathbf{R}_{\theta, \Delta\mathbf{r}} + \vec{\mathbf{r}}^T] = [[\mathbf{A}]\mathbf{R}_{\theta, \Delta\mathbf{r}}] \quad (11)$$

By defactoring  $\mathbf{A}\mathbf{R}_{\theta, \Delta\mathbf{r}}$  into  $\mathbf{A}\mathbf{R}_\theta + \Delta\mathbf{r}$ , we have:

$$[\mathbf{A}\mathbf{R}_\theta + \Delta\mathbf{r} + \vec{\mathbf{r}}^T] = [[\mathbf{A}]\mathbf{R}_\theta + \Delta\mathbf{r}] \quad (12)$$

Noting all elements in  $[\mathbf{A}]$  are integers, hence by assuming  $\theta \in \{\frac{k\pi}{2}\}_{k=0}^3$  and applying Lemma. 2, all elements in  $[\mathbf{A}]\mathbf{R}_\theta$  are also integers. Then by Lemma. 1, we have:

$$[\mathbf{A}\mathbf{R}_\theta + \Delta\mathbf{r} + \vec{\mathbf{r}}^T] = [\mathbf{A}]\mathbf{R}_\theta + [\Delta\mathbf{r}] \quad (13)$$

Leveraging the property that  $\mathbf{X} = [\mathbf{X}] + \{\mathbf{X}\}$ , we have:

$$[[([\mathbf{A}] + \{\mathbf{A}\})\mathbf{R}_\theta + [\Delta\mathbf{r}] + \{\Delta\mathbf{r}\} + \vec{\mathbf{r}}^T] = [\mathbf{A}]\mathbf{R}_\theta + [\Delta\mathbf{r}] \quad (14)$$

A simple deformation of this equation yields:

$$[[\mathbf{A}]\mathbf{R}_\theta + [\Delta\mathbf{r}] + \{\mathbf{A}\}\mathbf{R}_\theta + \{\Delta\mathbf{r}\} + \vec{\mathbf{r}}^T] = [\mathbf{A}]\mathbf{R}_\theta + [\Delta\mathbf{r}] \quad (15)$$

By Lemma. 1, we move the term  $[\mathbf{A}]\mathbf{R}_\theta + [\Delta\mathbf{r}]$  out of the left-hand side, and that yields:

$$[\{\mathbf{A}\}\mathbf{R}_\theta + \{\Delta\mathbf{r}\} + \vec{\mathbf{r}}^T] = \mathbf{0} \quad (16)$$

That is the exact form as Eq. 8 in the original paper.  $\square$

**Solution to Equation 10** Here we find the solution  $\gamma_0$  of:

$$\gamma_0 = \operatorname{argmin}_{\gamma \in [0, S_v]^3} \|\gamma - \{\mathbf{A}\}\mathbf{R}_\theta - \{\Delta\mathbf{r}\}\|_2 \quad (17)$$

We start by considering cases for unary functions. We find the solution  $\phi_0$  of:

$$\phi_0 = \operatorname{argmin}_{\phi \in [a, b]} \|\phi - M\|_2 \quad (18)$$

The solution is straight-forward. It denotes the closest value in  $[a, b]$  to a fixed value  $M$ . We represent the solution to this problem as:

$$\operatorname{clamp}(M, a, b) = \begin{cases} a, & M < a, \\ M, & a \leq M < b, \\ b, & M \geq b. \end{cases} \quad (19)$$

Since in the target function of this problem, the three axes are uncorrelated, we can break this problem to a problem set of three problems each equivalent to Eq. 10. We can extend the clamping function to a vector version, namely for any  $0 \leq i < \operatorname{len}(\mathbf{M})$ :

$$\operatorname{clamp}(\mathbf{M}, \mathbf{a}, \mathbf{b})_i = \operatorname{clamp}(\mathbf{M}_i, \mathbf{a}_i, \mathbf{b}_i) \quad (20)$$

Then the closed-form solution of  $\gamma_0$  can be formulated as:

$$\gamma_0 = \operatorname{clamp}(\mathbf{M} = \{\mathbf{A}\}\mathbf{R}_\theta + \{\Delta\mathbf{r}\}, (0, 0, 0), (S_v, S_v, S_v)) \quad (21)$$

That is the solution to the original problem.  $\square$

## B. Hyperparameter Study

$\tau_{\text{center}}$  and  $\tau_{\text{cls}}$ . We conducted a hyperparameter study (Fig. 1) on  $\tau_{\text{center}}$  and  $\tau_{\text{cls}}$ . These two hyperparameters are utilized to filter the initially matched set and provide matching pairs that offer less noisy supervision. Finding the optimal values involves a trade-off, as setting the values too low introduces noisy supervision, while setting them too high reduces the number of matched pairs.

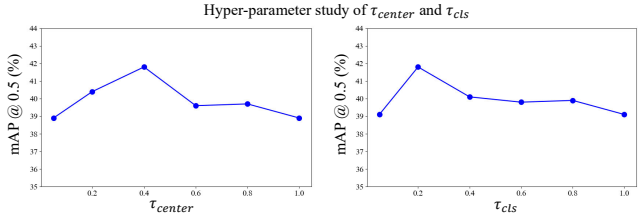

Figure 1: Hyper-parameter Study on  $\tau_{\text{center}}$  and  $\tau_{\text{cls}}$ .

| Backbone (Semi-supervised Setting)                   | mAP@0.25    | mAP@0.50    |
|------------------------------------------------------|-------------|-------------|
| FCAF3D (baseline)                                    | 58.2        | 42.1        |
| FCAF3D (+ Sparse Proposal Matching)                  | 62.0        | 44.2        |
| FCAF3D (+ Dense Matching, <i>ours</i> <i>DQS3D</i> ) | <b>64.3</b> | <b>48.5</b> |
| TR3D (baseline)                                      | 62.5        | 46.8        |
| TR3D (+ Dense Matching)                              | <b>65.4</b> | <b>49.9</b> |

Table 1: Comparison of *Dense Matching* and *Proposal Matching* Strategies with *Different Backbones* on ScanNet Dataset (20% Labeled). *Proposal matching* involves filtering teacher proposals and matching them with the nearest-center student predictions, while dense matching establishes matching based on spatially-aligned voxel anchors and then applies filtering. In dense matching, the proposed **Quantization Error Correction** module is enabled.

**Different Backbones.** We conducted experiments (Tab. 1) that show the superiority of dense matching over proposal matching. We argue that the success is originate from addressing issues like *no supervision* and *multiple supervision* problems, which we also qualitatively illustrate in Fig. 6. Note that dense matching is applicable

only to recent SOTA voxel-based detectors, not common two-stage proposal-based detectors based on Transformer or heatmaps. Hence we used TR3D (Rukhovich et al.), with the hyperparameters reported in our manuscript without further tuning. Remarkably, we observed an improvement of +3.1% on mAP@0.50.

## C. Further Discussion

**Computational Complexity Analysis.** We utilized the NVIDIA GeForce RTX 2080Ti. Training employed 4 GPUs (2 labeled and 2 unlabeled scenes per GPU card, occupying approximately 7.5GB per GPU) and took around 7 hours to converge. In terms of inference speed, our system achieves 10.3 scenes per second on a single 2080Ti.

**Limitation Analysis.** The trade-off between memory and voxel size hampers our 3D detectors' performance in outdoor scenes, which is a common limitation in the family of sparse convolutional detectors.
